# Supplementary material for: Construction of a hydrangea-like Bi2WO6/BiOCl composite as a high-performance photocatalyst
Source: Royal Society of Chemistry journal article supplement (doi:10.1039/d1nj05409k), 2021-12-21
Supplement: d1nj05409k1.pdf [file d1nj05409k1.pdf]

## Construction of hydrangea-like Bi<sub>2</sub>WO<sub>6</sub>/BiOCl composite for high-performance photocatalyst

Haiyan Jiang,<sup>a</sup> Yang Li,<sup>b</sup> Xu Wang<sup>b</sup> and Xiaodong Hong<sup>\*c,d</sup>

<sup>a</sup> Basis Department, Liaoning Institute of Science and Technology, Benxi 117004, China

<sup>b</sup> College of Materials Science and Engineering, Liaoning Technical University, Fuxin 123000, China

<sup>c</sup> College of Materials Science and Hydrogen Energy, Foshan University, Foshan 528000, China

<sup>d</sup> Guangdong Provincial Key Laboratory of Battery Recycling and Reuse

\*Correspondence: hxd9917@163.com

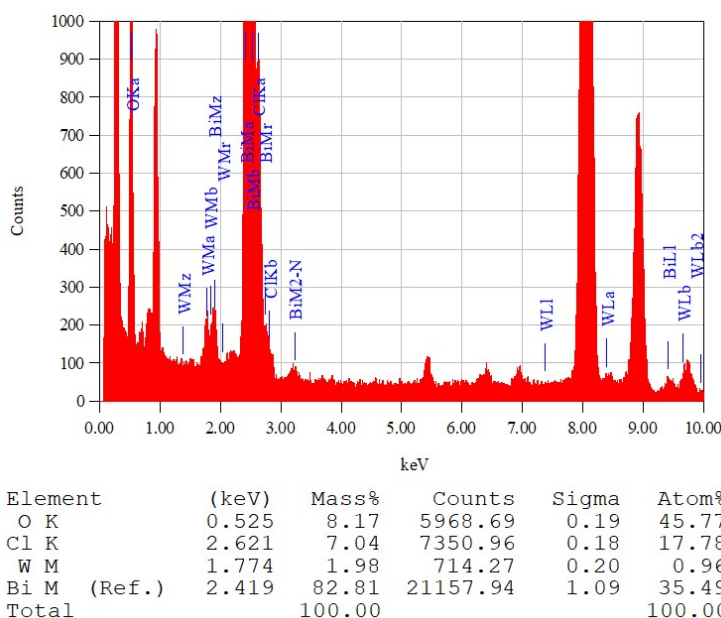

**Fig. S1.** Elemental fraction of Bi<sub>2</sub>WO<sub>6</sub>/BiOCl-1/1 composite derived from the elemental mapping from Fig. 3.

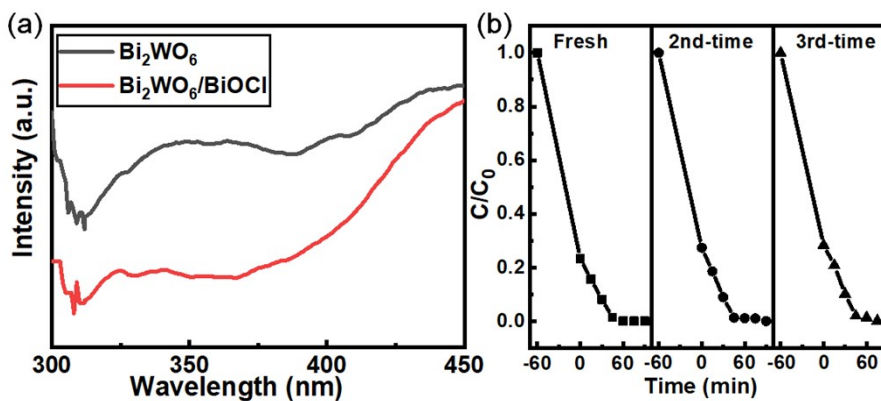

**Fig. S2.** Photoluminescence (PL) emission spectra (a) and the cycling degradation performance for degradation of RhB by using Bi<sub>2</sub>WO<sub>6</sub>/BiOCl-1/1 composite (b).

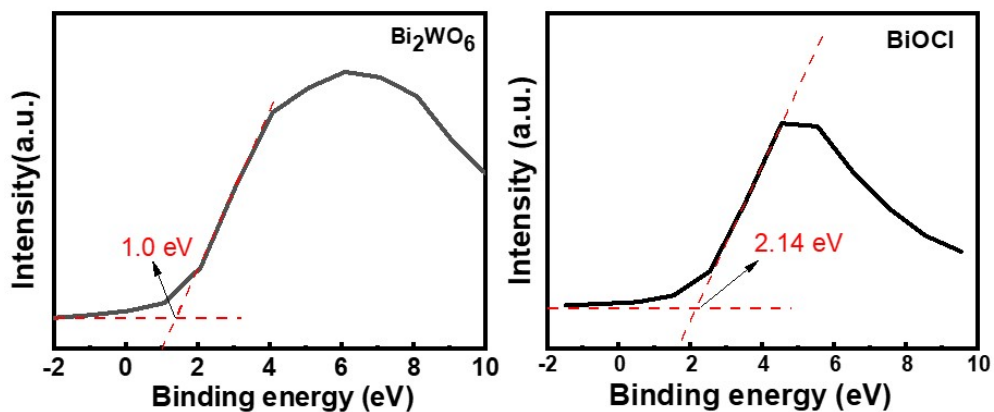

Fig. S3. Magnified XPS spectrum of (a)  $\text{Bi}_2\text{WO}_6$  and (b)  $\text{BiOCl}$ , and corresponding valence band edge

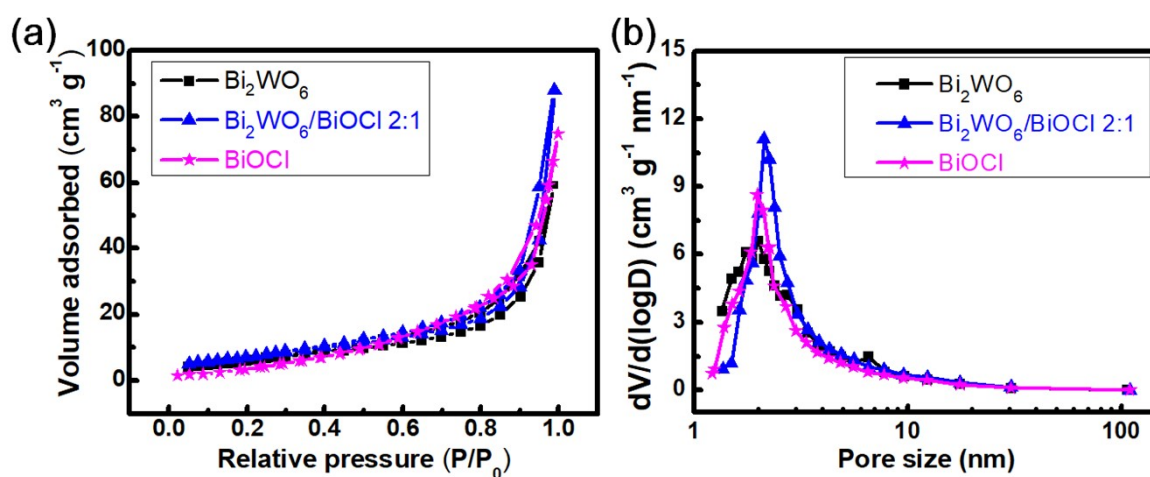

Fig. S4 the BET specific surface area and corresponding pore size distribution of different samples.

**Table S1.** The linear fitting results obtained from Fig. 5

| <i>Pollutants</i>         | <i>Sample</i>                              | <i>Reaction rate constant, k (min<sup>-1</sup>)</i> | <i>Intercept</i> |
|---------------------------|--------------------------------------------|-----------------------------------------------------|------------------|
|                           | Bi <sub>2</sub> WO <sub>6</sub>            | 0.0036                                              | 0.3812           |
| RhB solution<br>(Fig. 5c) | BiOCl                                      | 0.0040                                              | 0.7190           |
|                           | Bi <sub>2</sub> WO <sub>6</sub> /BiOCl-2/1 | 0.0126                                              | 0.6528           |
|                           | Bi <sub>2</sub> WO <sub>6</sub> /BiOCl-1/1 | 0.0941                                              | 0.6567           |
|                           | Bi <sub>2</sub> WO <sub>6</sub> /BiOCl-1/2 | 0.0049                                              | 0.9828           |
| MB solution<br>(Fig. 5f)  | Bi <sub>2</sub> WO <sub>6</sub>            | 0.0036                                              | 0.3812           |
|                           | BiOCl                                      | 0.0045                                              | 0.4813           |
|                           | Bi <sub>2</sub> WO <sub>6</sub> /BiOCl-2/1 | 0.0048                                              | 0.8212           |
|                           | Bi <sub>2</sub> WO <sub>6</sub> /BiOCl-1/1 | 0.0063                                              | 1.5823           |
|                           | Bi <sub>2</sub> WO <sub>6</sub> /BiOCl-1/2 | 0.0060                                              | 0.6149           |
| TCH solution<br>(Fig. 5i) | Bi <sub>2</sub> WO <sub>6</sub>            | 0.00691                                             | 0.46162          |
|                           | BiOCl                                      | 0.00941                                             | 0.52503          |
|                           | Bi <sub>2</sub> WO <sub>6</sub> /BiOCl-2/1 | 0.01143                                             | 0.64883          |
|                           | Bi <sub>2</sub> WO <sub>6</sub> /BiOCl-1/1 | 0.0143                                              | 0.73799          |
|                           | Bi <sub>2</sub> WO <sub>6</sub> /BiOCl-1/2 | 0.01174                                             | 0.60182          |

**Table S2.** The performance of reported Bi<sub>2</sub>WO<sub>6</sub>/BiOCl composite photocatalyst in degradation of organic dyes

| Photocatalyst                                          | Concent.              | Light    | Degrad.   | Time       | Morphology                                                                    | Ref.         |
|--------------------------------------------------------|-----------------------|----------|-----------|------------|-------------------------------------------------------------------------------|--------------|
| Bi <sub>2</sub> WO <sub>6</sub> /BiOCl<br>25mg/50mL    | 10 mg L <sup>-1</sup> | 300W-Xe  | RhB 100%  | 60 min     | Hydrangea-like Bi <sub>2</sub> WO <sub>6</sub> /<br>BiOCl composite           | This<br>work |
| Bi <sub>2</sub> WO <sub>6</sub> /BiOCl                 | RhB                   | Xe lamp  | RhB       | Adsorption | Hollow hierarchical structure                                                 | [33]         |
| Bi <sub>2</sub> WO <sub>6</sub> /BiOCl<br>100mg/100mL  | 10 mg L <sup>-1</sup> | 300W-Xe  | RhB 98%   | 5 min      | Single crystalline Bi <sub>2</sub> WO <sub>6</sub> +<br>polycrystalline BiOCl | [34]         |
| Bi <sub>2</sub> WO <sub>6</sub> /BiOCl<br>30mg/100mL   | 10 mg L <sup>-1</sup> | 300W-Xe  | RhB ~95%  | 90 min     | BiOCl microspheres+Bi <sub>2</sub> WO <sub>6</sub><br>nanosheets              | [21]         |
| Bi <sub>2</sub> WO <sub>6</sub> /BiOCl<br>100mg/100mL  | 50 mg L <sup>-1</sup> | 350W-Xe  | RhB 93.3% | 150 min    | BiOCl sheets + Bi <sub>2</sub> WO <sub>6</sub> plates                         | [12]         |
| Bi <sub>2</sub> WO <sub>6</sub> /BiOCl<br>50mg/50mL    | 5 mg L <sup>-1</sup>  | 300 W-Xe | RhB 99%   | 100 min    | Microrods coated<br>nanoparticles                                             | [20]         |
| Bi <sub>2</sub> WO <sub>6</sub> /BiOCl<br>45mg in 45mL | 10 mg L <sup>-1</sup> | 55W-Xe   | RhB 65%   | 80 min     | Nanostructured sheets                                                         | [16]         |
| Bi <sub>2</sub> WO <sub>6</sub> /BiOCl<br>10mg/60mL    | 10 mg L <sup>-1</sup> | 55W-Xe   | RhB 100%  | 80 min     | Bi <sub>2</sub> WO <sub>6</sub> microspheres<br>and BiOCl nanosheets          | [19]         |

## References

- 12 Z. Liang, C. Zhou, J. Yang, Q. Mo, Y. Zhang and Y. Tang, *Inorg. Chem. Commun.*, 2018, **93**, 136-139.
- 16 L. Derikvand and N. Tahmasebi, *Korean J. Chem. Eng.*, 2021, **38**, 163-169.
- 19 N. Tahmasebi, Z. Maleki and P. Farahnak, *Mat. Sci. Semicon. Proc.*, 2019, **89**, 32-40.
- 20 S. Zhu, C. Yang, F. Li, T. Li, M. Zhang and W. Cao, *Mol. Catal.*, 2017, **435**, 33-48.
- 21 Y. Ma, Z. Chen, D. Qu and J. Shi, *Appl. Surf. Sci.*, 2016, **361**, 63-71.
- 33 Y. Ma, C. Lv, J. Hou, S. Yuan, Y. Wang, P. Xu, G. Gao and J. Shi, *Nanomaterials*, 2019, **9**, 322.
- 34 Q. Yang, M. Luo, K. Liu, H. Cao and H. Yan, *Chem. Commun.*, 2019, **55**, 5728-5731.
